# Supplementary material for: Experimental and computational investigation of a DNA-shielded 3D metal–organic framework for the prompt dual sensing of Ag+ and S2−
Source: Royal Society of Chemistry journal article supplement (doi:10.1039/c9ra02028d), 2019-01-01
Supplement: c9ra02028d1.pdf [file c9ra02028d1.pdf]

# Experimental and computational investigation of a DNA-shielded 3D metal–organic framework for the prompt dual sensing of Ag<sup>+</sup> and S<sup>2-</sup>

Shao-Lan Cai, Zi-Chuan Yang, Ke-Yang Wu, Cheng Fan, Ling-Yan Zhai, Nai-Han Huang, Rong-Tian Li, Wen-Jun Duan\* and Jin-Xiang Chen\*

|                                                                                                                                                                                                                                                                                                                                                                                                                                                                                                                                                                                                                                                                                                                                                                     |      |
|---------------------------------------------------------------------------------------------------------------------------------------------------------------------------------------------------------------------------------------------------------------------------------------------------------------------------------------------------------------------------------------------------------------------------------------------------------------------------------------------------------------------------------------------------------------------------------------------------------------------------------------------------------------------------------------------------------------------------------------------------------------------|------|
| <b>Ag<sup>+</sup> and S<sup>2-</sup> detection experiments</b> .....                                                                                                                                                                                                                                                                                                                                                                                                                                                                                                                                                                                                                                                                                                | S-2  |
| <b>Computational molecular simulation studies</b> .....                                                                                                                                                                                                                                                                                                                                                                                                                                                                                                                                                                                                                                                                                                             | S-3  |
| <b>Table S1</b> Crystallographic data for <b>1</b> .....                                                                                                                                                                                                                                                                                                                                                                                                                                                                                                                                                                                                                                                                                                            | S-4  |
| <b>Table S2</b> Selected bond distances (Å) and angles (°) for <b>1</b> .....                                                                                                                                                                                                                                                                                                                                                                                                                                                                                                                                                                                                                                                                                       | S-5  |
| <b>Table S3</b> The analytical performance of various Ag <sup>+</sup> sensors.....                                                                                                                                                                                                                                                                                                                                                                                                                                                                                                                                                                                                                                                                                  | S-5  |
| <b>Table S4</b> Comparison of different sensing platforms for S <sup>2-</sup> detection.....                                                                                                                                                                                                                                                                                                                                                                                                                                                                                                                                                                                                                                                                        | S-5  |
| <b>Table S5</b> The single point energy results of P-DNA, P-DNA@ <b>1</b> , ds-DNA@Ag <sup>+</sup> and <b>1</b> + ds-DNA@Ag <sup>+</sup> .....                                                                                                                                                                                                                                                                                                                                                                                                                                                                                                                                                                                                                      | S-6  |
| <b>Table S6</b> Detection of Ag <sup>+</sup> in environmental water samples.....                                                                                                                                                                                                                                                                                                                                                                                                                                                                                                                                                                                                                                                                                    | S-6  |
| <b>Table S7</b> Detection of S <sup>2-</sup> in environmental water samples.....                                                                                                                                                                                                                                                                                                                                                                                                                                                                                                                                                                                                                                                                                    | S-6  |
| <b>Fig. S1</b> PXRD patterns of MOF <b>1</b> showing agreement among the simulated, as-synthesized and fresh powder of MOF <b>1</b> immerse in Hepes buffer (20 mM, pH = 6.5, 7.0, 7.4) for 24 h respectively.....                                                                                                                                                                                                                                                                                                                                                                                                                                                                                                                                                  | S-7  |
| <b>Fig. S2</b> The SEM image of MOF <b>1</b> .....                                                                                                                                                                                                                                                                                                                                                                                                                                                                                                                                                                                                                                                                                                                  | S-7  |
| <b>Fig. S3</b> Comparison of the intensity of the emission peak (582 nm) of the P-DNA in 20 mM Hepes buffer ((pH = 6.5, 7.0, 7.4) in 4 h.....                                                                                                                                                                                                                                                                                                                                                                                                                                                                                                                                                                                                                       | S-8  |
| <b>Fig. S4</b> (a) The fluorescence quenching of the P-DNA (50 nM) incubated with MOF <b>1</b> with increasing concentrations in Hepes buffer (pH 7.4, 20 mM). (b) The fluorescence recovery of P-DNA@ <b>1</b> (50 nM/ 9 μM) sensor towards Ag <sup>+</sup> with different concentrations in Hepes buffer (pH 7.4, 20 mM). (c) The fluorescence quenching of <b>1</b> + ds-DNA@Ag <sup>+</sup> (9 μM/50 nM/6 μM) sensing system towards S <sup>2-</sup> with different concentrations in Hepes buffer (pH 7.4, 20 mM). Insets: plots of fluorescence intensity of P-DNA at 582 nm versus the concentrations of MOF <b>1</b> (a), Ag <sup>+</sup> (b) and S <sup>2-</sup> (b) respectively. Error bars represent the standard deviation for three measurements..... | S-9  |
| <b>Fig. S5</b> (a) The fluorescence quenching of the P-DNA (50 nM) incubated with different concentrations of MOF <b>1</b> in different pH Hepes buffer solutions (pH = 6.5, 7.0, 7.4). (b) The fluorescence recovery of P-DNA@ <b>1</b> (50 nM/9.0 μM) sensing system towards different concentrations of Ag <sup>+</sup> in different pH buffer solutions (pH = 6.5, 7.0, 7.4). (c) The fluorescence quenching of <b>1</b> + ds-DNA@Ag <sup>+</sup> (9.0 μM/50 nM/6.0 μM) sensing system towards various concentrations of S <sup>2-</sup> in different pH buffer solutions (pH = 6.5, 7.0, 7.4).....                                                                                                                                                             | S-9  |
| <b>Reference</b> .....                                                                                                                                                                                                                                                                                                                                                                                                                                                                                                                                                                                                                                                                                                                                              | S-10 |

### Ag<sup>+</sup> and S<sup>2-</sup> detection experiments

In the following experiments, all the detection systems were performed in 20 mM Hepes buffer (pH = 6.5, 7.0, 7.4) at room temperature. Both the excitation and emission slit widths are 10.0 nm. The fluorescence intensity at 582 nm ( $\lambda_{\text{ex}} = 560$  nm) was used for quantitative analysis. Each experiment was carried out three times, and the mean values were taken.

First, set up the Ag<sup>+</sup> sensor. The solution of P-DNA (50 nM) was stirred with the increasing concentration of MOF **1** which contained 50 nM P-DNA until quenching to saturation creating P-DNA@**1** complex (Ag<sup>+</sup> sensor). The corresponding fluorescence spectra were measured and the quenching efficiency ( $Q_E$ , %) was calculated according to Eq. (1).

$$Q_E = (1 - F_M/F_0) \times 100\% \quad (1)$$

Here,  $F_M$  and  $F_0$  are fluorescent intensities at 582 nm in the presence and absence of MOF **1**, respectively.

Second, evaluate the detection sensitivity of the Ag<sup>+</sup> sensor and build S<sup>2-</sup> sensor. Adding Ag<sup>+</sup> of various concentrations to the above P-DNA@**1** system, followed by incubating for 5 min to form the mixture of **1** + P-DNA@Ag<sup>+</sup> (S<sup>2-</sup> sensor) and the fluorescence recovery efficiency ( $R_E$ ) was calculated according to Eq. (2).

$$R_E = F_T/F_M - 1 \quad (2)$$

Here  $F_T$  and  $F_M$  are the fluorescence intensities at 582 nm in the presence and the absence of Ag<sup>+</sup>, respectively.

Third, assess the detection sensitivity of the constructed S<sup>2-</sup> sensor. Adding S<sup>2-</sup> of different concentrations to the above **1** + P-DNA@Ag<sup>+</sup> solution until quenching was saturated and the quenching efficiency ( $Q_E$ , %) was calculated according to Eq. (1).

To evaluate the selectivity of the Ag<sup>+</sup> and S<sup>2-</sup> sensor, other metal ions (Hg<sup>2+</sup>, Ba<sup>2+</sup>, Ca<sup>2+</sup>, Cd<sup>2+</sup>, Cu<sup>2+</sup>, K<sup>+</sup>, Mg<sup>2+</sup>, Mn<sup>2+</sup>, Na<sup>+</sup>, Ni<sup>+</sup>, Pb<sup>2+</sup>, Zn<sup>2+</sup>, Cr<sup>3+</sup>, Co<sup>2+</sup>, Fe<sup>2+</sup>) and anions

(SO<sub>4</sub><sup>2-</sup>, CO<sub>3</sub><sup>2-</sup>, NO<sub>3</sub><sup>-</sup>, OH<sup>-</sup>, HSO<sub>4</sub><sup>-</sup>, H<sub>2</sub>PO<sub>4</sub><sup>-</sup>, F<sup>-</sup>, Cl<sup>-</sup>, Br<sup>-</sup>, I<sup>-</sup>) with the concentrations of 5-fold higher than Ag<sup>+</sup> and S<sup>2-</sup> were investigated under the same experimental conditions.

### Computational molecular simulation studies

The 3D structure of MOF **1**, P-DNA and ds-DNA@Ag<sup>+</sup> were constructed using Molecular Operating Environment (MOE) package.<sup>1</sup> The initial structure of P-DNA@**1** or **1** + ds-DNA@Ag<sup>+</sup> was manually built by the placement of P-DNA or ds-DNA@Ag<sup>+</sup> in the location 2 Å to the MOF **1** plane. Structures were first optimized in MOE using MMFF94x force field and then re-optimized in UFF of Gaussian 09<sup>2</sup> where Gibbs free energy calculations were simplified by calculating single point energies. Finally, Python molecule (PyMOL)<sup>3</sup> was employed for visual analysis of binding modes. The binding free energy difference ( $\Delta\Delta G$ ) between reactions of MOF **1** with single chain P-DNA ( $\Delta G_{\text{P-DNA@MOF}}$ ) or double chain ds-DNA@Ag<sup>+</sup> ( $\Delta G_{\text{MOF+ds-DNA@Ag}^+}$ ) is evaluated according to the following Eq. (3).

$$\begin{aligned}\Delta\Delta G &= \Delta G_{\text{P-DNA@MOF}} - \Delta G_{\text{MOF+ds-DNA@Ag}^+} \\ &= [G_{\text{P-DNA@MOF}} - (G_{\text{MOF}} + G_{\text{P-DNA}})] - [G_{\text{MOF+ds-DNA@Ag}^+} - (G_{\text{MOF}} + G_{\text{ds-DNA@Ag}^+})] \\ &= (G_{\text{P-DNA@MOF}} - G_{\text{MOF+ds-DNA@Ag}^+}) - (G_{\text{P-DNA}} - G_{\text{ds-DNA@Ag}^+}) \quad (3)\end{aligned}$$

**Table S1** Crystallographic data for **1**

---

|                                          |                                                                  |                                                |             |
|------------------------------------------|------------------------------------------------------------------|------------------------------------------------|-------------|
| Formula                                  | C <sub>27</sub> H <sub>21</sub> N <sub>3</sub> O <sub>6</sub> Cu | Formula weight                                 | 547.01      |
| Crystal system                           | monoclinic                                                       | Space group                                    | <i>C2/c</i> |
| <i>a</i> (Å)                             | 31.299(3)                                                        | <i>b</i> (Å)                                   | 11.9822(9)  |
| <i>c</i> (Å)                             | 19.7406(16)                                                      | $\alpha$ (°)                                   | 90.00       |
| $\beta$ (°)                              | 122.8270(13)                                                     | $\gamma$ (°)                                   | 90.00       |
| <i>V</i> (Å <sup>3</sup> )               | 6221.1(9)                                                        | <i>Z</i>                                       | 8           |
| <i>T</i> /K                              | 291(2)                                                           | <i>D</i> <sub>calc</sub> (g cm <sup>-3</sup> ) | 1.168       |
| $\lambda$ (Mo-K $\alpha$ ) (Å)           | 0.71073                                                          | $\mu$ (cm <sup>-1</sup> )                      | 0.740       |
| Total reflections                        | 19649                                                            | Unique reflections                             | 6316        |
| No. Observations                         | 5371                                                             | No. Parameters                                 | 334         |
| <i>R</i> <sup>a</sup>                    | 0.0376                                                           | <i>wR</i> <sup>b</sup>                         | 0.1169      |
| GOF <sup>c</sup>                         | 1.110                                                            | $\Delta\rho_{\max}$ (e Å <sup>-3</sup> )       | 0.689       |
| $\Delta\rho_{\min}$ (e Å <sup>-3</sup> ) | -0.496                                                           |                                                |             |

---

<sup>a</sup>  $R_1 = \Sigma||F_o| - |F_c||/\Sigma|F_o|$ ,  $wR_2 = \{\Sigma[w(F_o^2 - F_c^2)^2]/\Sigma[w(F_o^2)^2]\}^{1/2}$ , GOF =  $\{\Sigma[w(F_o^2 - F_c^2)^2]/(n - p)\}^{1/2}$ , where *n* is the number of reflections and *p* is total number of parameters refined.

**Table S2** Selected bond distances (Å) and angles (°) for MOF 1.

| bond distances [Å]  |            |                     |            |
|---------------------|------------|---------------------|------------|
| Cu(1)-O(1)          | 1.9506(12) | Cu(1)-O(4)#1        | 1.9930(13) |
| Cu(1)-N(2)          | 2.0322(17) | Cu(1)-N(3)#2        | 2.0381(17) |
| Cu(1)-O(2)#3        | 2.2056(13) |                     |            |
| bond angles [°]     |            |                     |            |
| O(1)-Cu(1)-O(4)#1   | 145.13(6)  | O(1)-Cu(1)-N(2)     | 90.55(6)   |
| O(4)#1-Cu(1)-N(2)   | 86.95(7)   | O(1)-Cu(1)-N(3)#2   | 95.03(6)   |
| O(4)#1-Cu(1)-N(3)#2 | 90.50(6)   | N(2)-Cu(1)-N(3)#2   | 173.35(6)  |
| O(1)-Cu(1)-O(2)#3   | 123.12(6)  | O(4)#1-Cu(1)-O(2)#3 | 91.59(6)   |
| N(2)-Cu(1)-O(2)#3   | 88.23(6)   | N(3)#2-Cu(1)-O(2)#3 | 85.71(6)   |

Symmetry transformations used to generate equivalent atoms: #1:  $x, -y, z - 1/2$ ; #2  $x + 1/2, -y - 1/2, z + 1/2$ ; #3:  $-x + 1/2, -y - 1/2, -z + 1$ .

**Table S3** The analytical performance of various Ag<sup>+</sup> sensors

| Sensor                                     | Linear range(μM) | Detection limit (nM) | Reference |
|--------------------------------------------|------------------|----------------------|-----------|
| Tetraphenyl ethylene                       | 0.5–80           | 874                  | 4         |
| Carbon dots                                | 0–90             | 320                  | 5         |
| Iminazobe derivatixes                      | 0–0.9            | 101                  | 6         |
| Gold nanoparticle                          | 0.1–0.9          | 7.3                  | 7         |
| g-C <sub>3</sub> N <sub>4</sub> nanosheets | 0–0.04           | 4.2                  | 8         |
| P-DNA@MOF                                  | 0–1.6            | 3.8                  | This work |

**Table S4** Comparison of different sensing platforms for S<sup>2-</sup> detection

| Sensor                                     | Linear range(μM) | Detection limit (nM) | Reference |
|--------------------------------------------|------------------|----------------------|-----------|
| Nanocomposite                              | 2.67–596         | 138                  | 9         |
| gold nanoparticles                         | 0.5–10           | 80                   | 10        |
| DNA@ copper nanoparticles                  | 0.2–20           | 80                   | 11        |
| nanoAg–carbon                              | 0.05–100         | 27                   | 12        |
| g-C <sub>3</sub> N <sub>4</sub> nanosheets | 0–0.03           | 3.5                  | 8         |
| P-DNA@MOF                                  | 0–6              | 5.5                  | This work |

**Table S5** The single point energy results of P-DNA, P-DNA@1, ds-DNA@Ag<sup>+</sup> and 1 + ds-DNA@Ag<sup>+</sup>.

| System                     | Energy (kcal/mol) | Energy (kcal/mol) |
|----------------------------|-------------------|-------------------|
| P-DNA                      | 13.5833           | 8523.64           |
| P-DNA@1                    | 12.5881           | 7899.08           |
| ds-DNA@Ag <sup>+</sup>     | 11.8942           | 7463.72           |
| 1 + ds-DNA@Ag <sup>+</sup> | 11.1862           | 7019.44           |
| $\Delta\Delta G$           | -0.2872           | -180.24           |

**Table S6** Detection of Ag<sup>+</sup> in environmental water samples

| Sample        | C <sub>Ag<sup>+</sup></sub> in the sample (μM) | Spiked (μM) | Found (μM) | Recovery (%) | RSD (%) |
|---------------|------------------------------------------------|-------------|------------|--------------|---------|
| Tap water     | 0                                              | 0.60        | 0.59       | 98.2         | 0.16    |
| Lake water    | 0                                              | 0.60        | 0.61       | 101.8        | 0.98    |
| Mineral water | 0                                              | 0.60        | 0.61       | 101.6        | 0.58    |

**Table S7** Detection of S<sup>2-</sup> in environmental water samples

| Sample        | C <sub>S<sup>2-</sup></sub> in the sample (μM) | Spiked (μM) | Found (μM) | Recovery (%) | RSD (%) |
|---------------|------------------------------------------------|-------------|------------|--------------|---------|
| Tap water     | 0                                              | 0.60        | 0.64       | 107.3        | 1.37    |
| Lake water    | 0                                              | 0.60        | 0.59       | 99.0         | 3.10    |
| Mineral water | 0                                              | 0.60        | 0.61       | 101.2        | 2.57    |

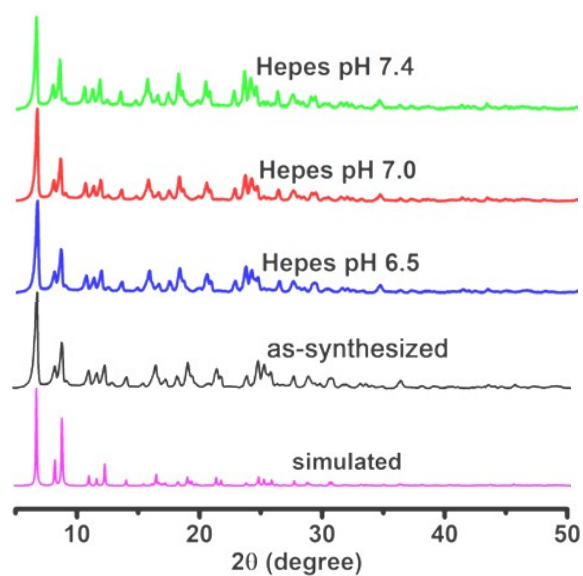

**Fig. S1** PXRD patterns of MOF 1 showing an agreement among the simulated, as-synthesized and fresh powder of MOF 1 immerse in Hepes buffer (20 mM, pH = 6.5, 7.0, 7.4) for 24 h, respectively.

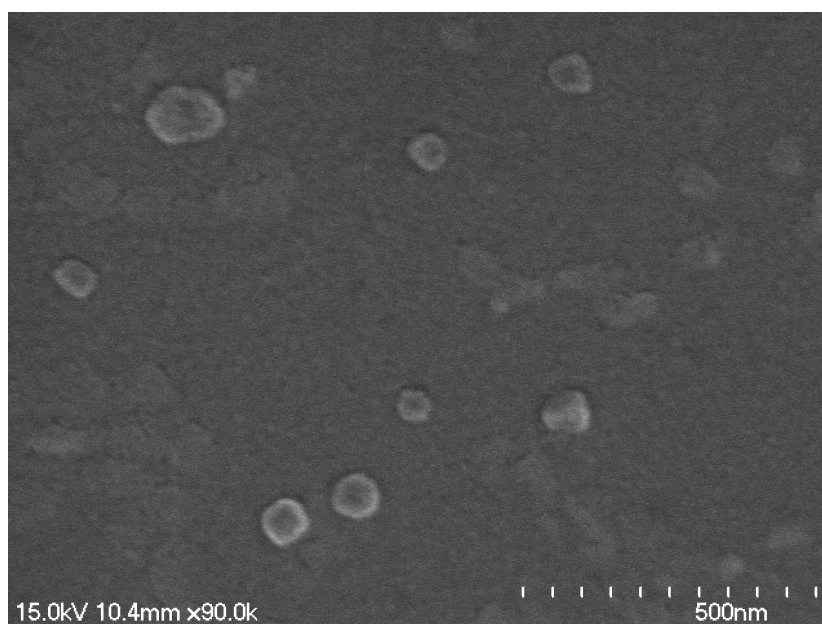

**Fig. S2** The SEM image of MOF 1.

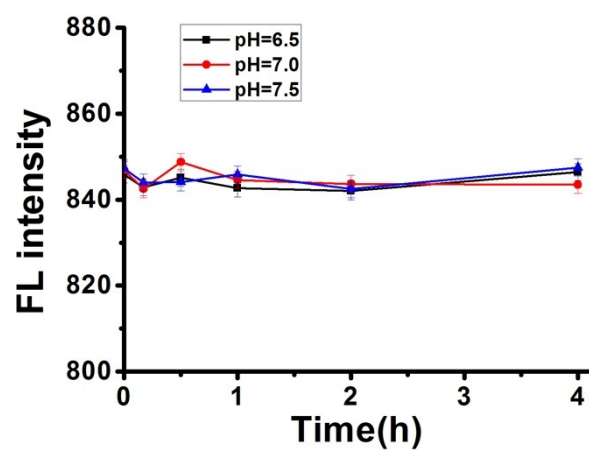

**Fig. S3** Comparison of the intensity of the emission peak (582 nm) of the P-DNA in 20 mM Hepes buffer (pH = 6.5, 7.0, 7.4) for 4 h.



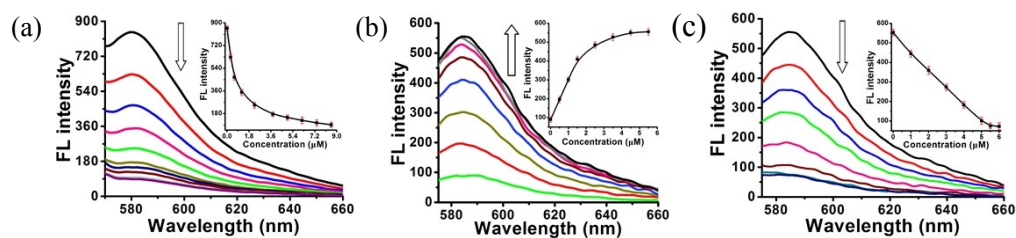

**Fig. S4** (a) The fluorescence quenching of the P-DNA (50 nM) incubated with MOF **1** with increasing concentrations in Hepes buffer (pH 7.4, 20 mM). (b) The fluorescence recovery of P-DNA@**1** (50 nM/ 9  $\mu$ M) sensor towards  $\text{Ag}^+$  with different concentrations in Hepes buffer (pH 7.4, 20 mM). (c) The fluorescence quenching of **1** + ds-DNA@ $\text{Ag}^+$  (9  $\mu$ M/50 nM/6  $\mu$ M) sensing system towards  $\text{S}^{2-}$  with different concentrations in Hepes buffer (pH 7.4, 20 mM). Insets: plots of fluorescence intensity of P-DNA at 582 nm versus the concentrations of MOF **1** (a),  $\text{Ag}^+$  (b) and  $\text{S}^{2-}$  (b) respectively. Error bars represent the standard deviation for three measurements.

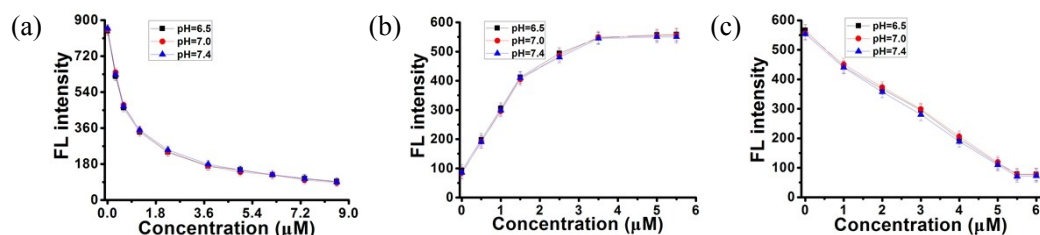

**Fig. S5** (a) The fluorescence quenching of the P-DNA (50 nM) incubated with different concentrations of MOF **1** in different pH Hepes buffer solutions (pH = 6.5, 7.0, 7.4). (b) The fluorescence recovery of P-DNA@**1** (50 nM/9.0  $\mu$ M) sensing system towards different concentrations of  $\text{Ag}^+$  in different pH buffer solutions (pH = 6.5, 7.0, 7.4). (c) The fluorescence quenching of **1** + ds-DNA@ $\text{Ag}^+$  (9.0  $\mu$ M/50 nM/6.0  $\mu$ M) sensing system towards various concentrations of  $\text{S}^{2-}$  in different pH buffer solutions (pH = 6.5, 7.0, 7.4).

## Reference

1. *Molecular Operating Environment (MOE)*, 2014.09; Chemical Computing Group Inc., 1010 Sherbooke St. West, Suite #910, Montreal, QC, Canada, H3A 2R7, **2014**.
2. Frisch, M. J.; Trucks, G. W.; Schlegel, H. B.; Scuseria, G. E.; Robb, M. A.; Cheeseman, J. R.; Scalmani, G.; Barone, V.; Mennucci, B.; Petersson, G. A.; Nakatsuji, H.; Caricato, M.; Li, X.; Hratchian, H. P.; Izmaylov, A. F.; Bloino, J.; Zheng, G.; Sonnenberg, J. L.; Hada, M.; Ehara, M.; Toyota, K.; Fukuda, R.; Hasegawa, J.; Ishida, M.; Nakajima, T.; Honda, Y.; Kitao, O.; Nakai, H.; Vreven, T.; Montgomery, J. A.; Jr.; Peralta, J. E.; Ogliaro, F.; Bearpark, M.; Heyd, J. J.; Brothers, E.; Kudin, K. N.; Staroverov, V. N.; Kobayashi, R.; Normand, J.; Raghavachari, K.; Rendell, A.; Burant, J. C.; Iyengar, S. S.; Tomasi, J.; Cossi, M.; Rega, N.; Millam, J. M.; Klene, M.; Knox, J. E.; Cross, J. B.; Bakken, V.; Adamo, C.; Jaramillo, J.; Gomperts, R.; Stratmann, R. E.; Yazyev, O.; Austin, A. J.; Cammi, R.; Pomelli, C.; Ochterski, J. W.; Martin, R. L.; Morokuma, K.; Zakrzewski, V. G.; Voth, G. A.; Salvador, P.; Dannenberg, J. J.; Dapprich, S.; Daniels, A. D.; Farkas, O.; Foresman, J. B.; Ortiz, J. V.; Cioslowski, J.; Fox, D. J. *Gaussian 09*, revision D.01; Gaussian, Inc.: Wallingford CT, **2013**.
3. Schrödinger, LLC. The PyMOL molecular graphics system, version 1.8, **2015**.
4. Y. Li, H. Yu, G. Shao, F. J. Gan, *J. Photochem. Photobiol. A*, 2015, **301**, 14.
5. X. H. Gao, Y. Z. Lu, R. Z. Zhang, S. J. He, J. Ju, M. M. Liu, L. Li, W. Chen, *J. Mater. Chem. C*, 2015, **3**, 2302.
6. B. Zhao, Y. Xu, Y. Fang, L. Y. Wang, Q. G. Deng, *Tetrahedron Lett.*, 2015, **56**, 2460.
7. J. J. Du, H. Du, H. Y. Ge, *Sens. Actuators, B*, 2017, **4005**, 31456.
8. S. Wang, D. Du, M. Yang, Q. Lu, R. Ye, X. Yan, *Talanta*, 2017, **168**, 168.
9. T. Zhou, N. Wang, C. Li, H. Yuan, D. Xiao, *Anal. Chem.*, 2010, **82**, 1705.
10. H. H. Deng, S. H. Weng, S. L. Huang, L. N. Zhang, A. L. Liu, X. H. Lin, *Anal. Chim. Acta*, 2014, **852**, 218.
11. J. Liu, J. H. Chen, Z. Y. Fang, *Analyst*, 2012, **137**, 5502.
12. Z. X. Wang, C. L. Zheng, Q. L. Li, S. N. Ding, *Analyst*, 2014, **139**, 1751.
